# Supplementary material for: Conformational analysis of the neutral exopolysaccharide produced by Lactobacillus delbrueckii ssp. bulgaricus LBB.B26
Source: Royal Society of Chemistry journal article supplement (doi:10.1039/b810468a), 2008-11-20
Supplement: b810468a.pdf [file b810468a.pdf]

## Supplementary data

Figure S1. MM3 free energy maps derived from population analysis of a MD simulation of the extended repeating unit **E-D-A-[C]-B-E-D** (30 ns / 700 K). a,  $\beta$ -D-Galp-(1 $\rightarrow$ 4)- $\beta$ -D-Glcp; b,  $\beta$ -D-Glcp-(1 $\rightarrow$ 3)- $\beta$ -D-Galf; c,  $\beta$ -D-Galf-(1 $\rightarrow$ 3)- $\alpha$ -D-Galp; d,  $\alpha$ -D-Glcp-(1 $\rightarrow$ 6)- $\alpha$ -D-Galp; e,  $\alpha$ -D-Galp-(1 $\rightarrow$ 3)- $\beta$ -D-Galp. Iso-energy contours have been plotted at regular intervals of 1 kcal/mole up to 10 kcal/mole above the global minimum in each map.

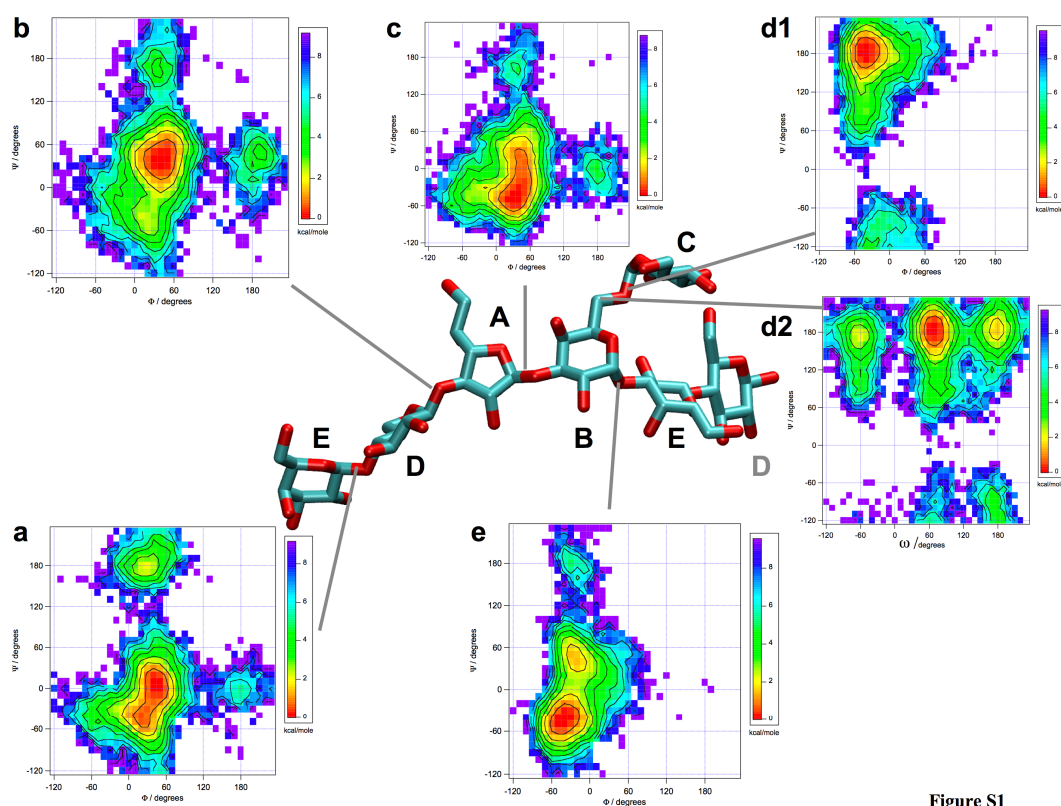

Figure S1
